# Supplementary material
Source: PubMed Central journal article supplement (PMC5951902)
Supplement: 41422_2018_29_MOESM3_ESM.pdf [file 41422_2018_29_MOESM3_ESM.pdf]

## Supplementary information, Figure S3

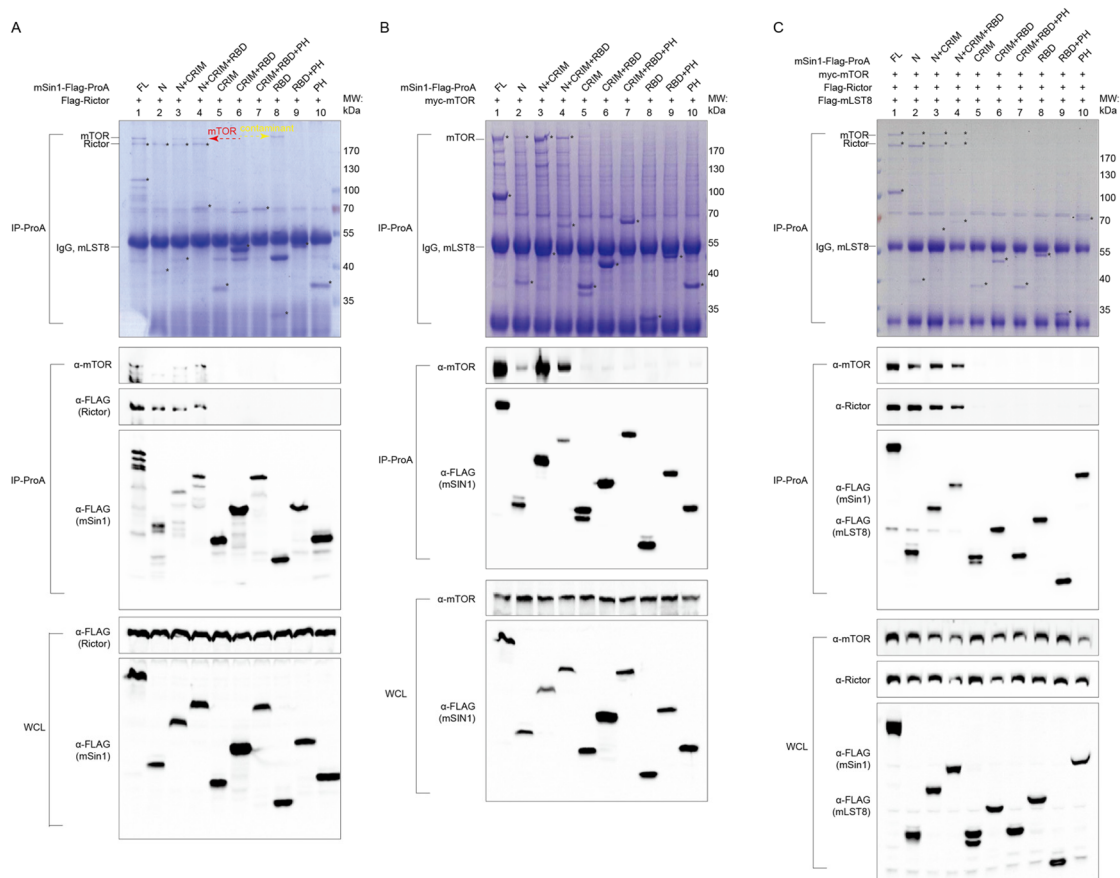

**Figure S3** Domains of mSin1 important for interaction with mTORC2 components.

(A-C) Co-immunoprecipitations of various mSin1 truncations with Rictor (A), mTOR (B), and the three mTORC2 components (C). The indicated plasmids were co-transfected into 293F cells. Various C-terminally ProA-tagged mSin1 truncations were immobilized onto IgG resins. The bound proteins were subjected to SDS-PAGE and visualized by Coomassie blue (upper panels) with the positions of target proteins indicated by black stars. The bound proteins and whole cell lysates (WCL) were subjected to SDS-PAGE and visualized by western blotting using antibodies as indicated (lower panels). Note that in lane 8 of A, the band (indicated by yellow arrow) is an unknown contaminant, which migrated to a position close to that of mTOR (indicated by red arrow). Lanes 5-10 of A, B, and C serve as negative control for A, B, and C, respectively.
