# Supplementary material
Source: PubMed Central journal article supplement (PMC5951902)
Supplement: 41422_2018_29_MOESM4_ESM.pdf [file 41422_2018_29_MOESM4_ESM.pdf]

## Supplementary information, Figure S4

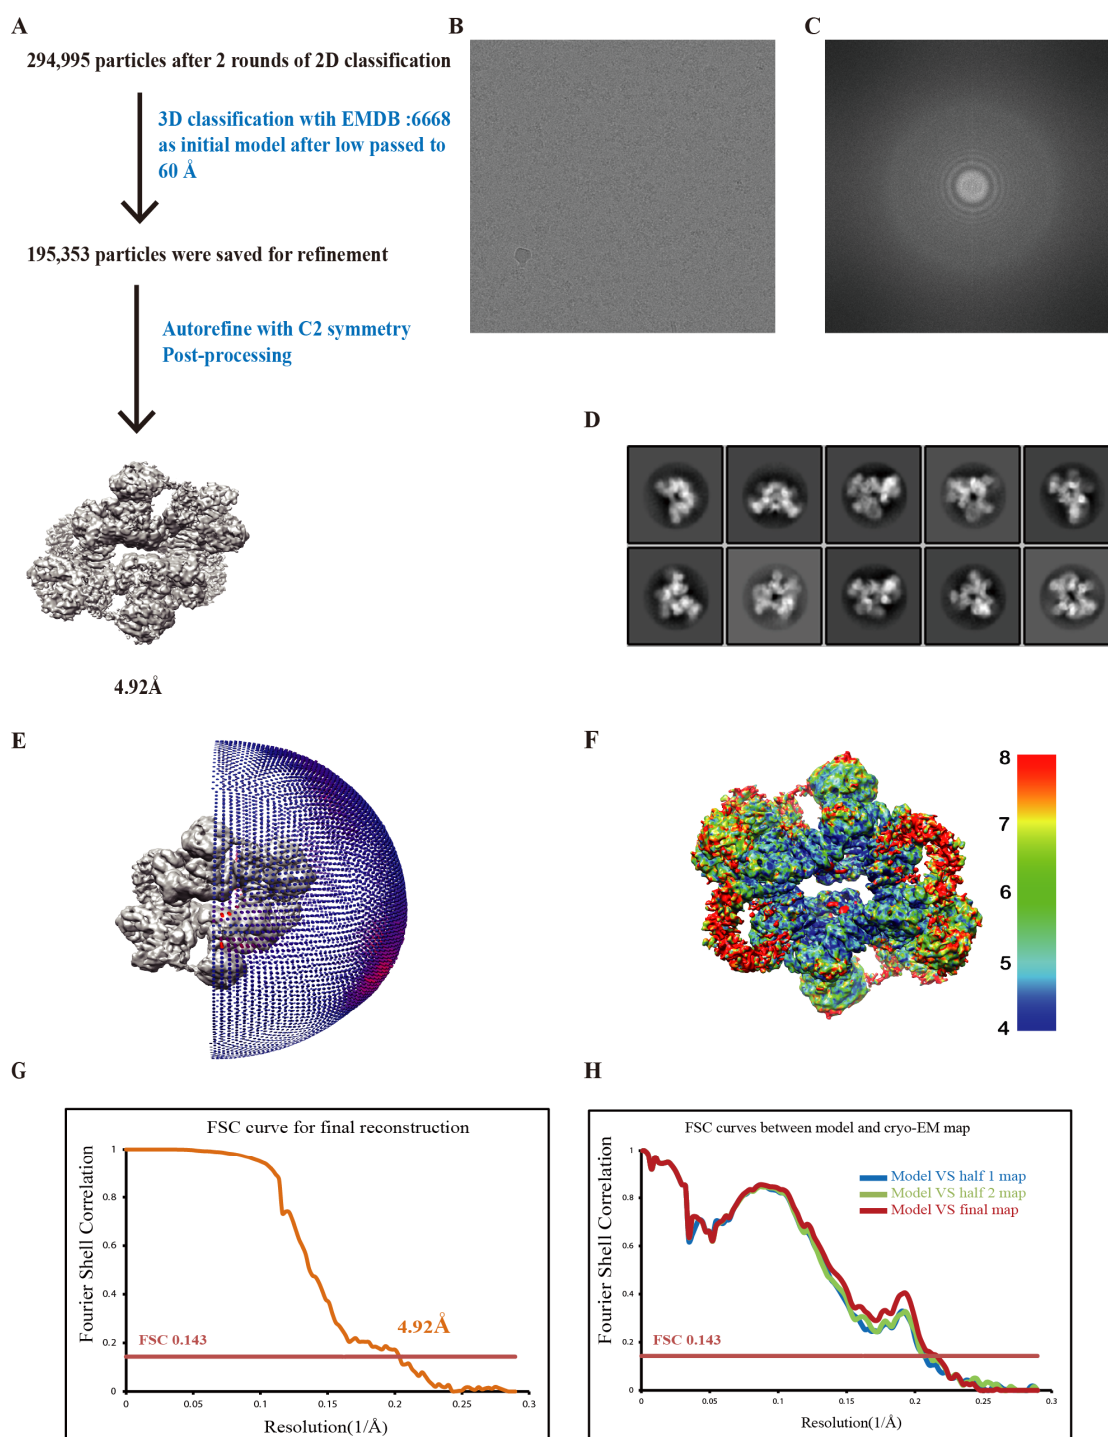

**Figure S4** Cryo-EM structure determination of mTORC2. **(A)** Flow-chart of cryo-EM data processing. **(B, C)** Representative raw micrograph of cryo-EM mTORC2 **(B)** and its Fourier transforms **(C)**. **(D)** Representative 2D class average of cryo-EM mTORC2

particles. **(E)** Angular distribution of cryo-EM mTORC2 used for final reconstruction. **(F)** Local resolution map of mTORC2 calculated by ResMap. **(G, H)** FSC curves for the final 3D density map and the FSC between model and cryo-EM map.
