# Supplementary material
Source: PubMed Central journal article supplement (PMC5951902)
Supplement: 41422_2018_29_MOESM6_ESM.pdf [file 41422_2018_29_MOESM6_ESM.pdf]

## Supplemental information, Figure S6

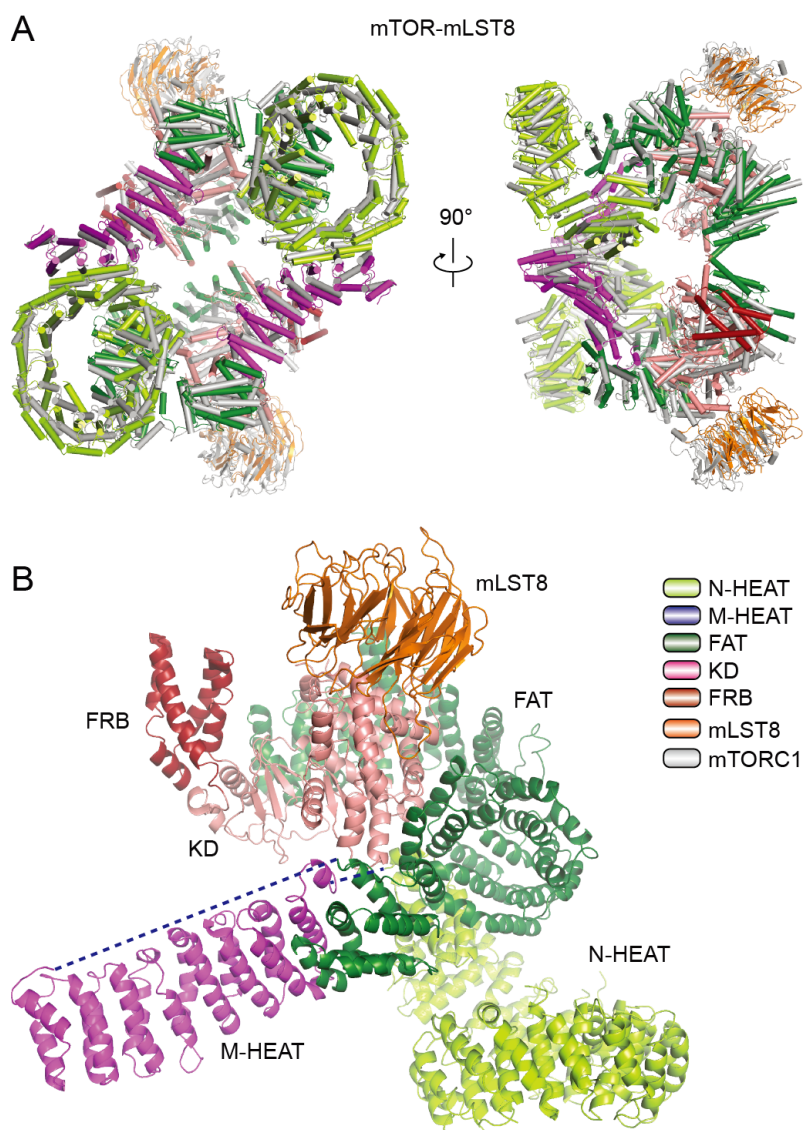

**Figure S6** Structural comparison of mTORC1 and mTORC2. **(A)** Superimposition of the mTORC1 (PDB: 5H64) and mTORC2 structures with mTOR-mLST8 dimer of heterodimer shown in two different views. The color scheme is indicated. **(B)** Topological arrangement of mTOR in the mTORC2 structure. The N-HEAT, M-HEAT, and the FAT domains are connected by dashed lines.
