# Supplementary material
Source: PubMed Central journal article supplement (PMC5951902)
Supplement: 41422_2018_29_MOESM7_ESM.pdf [file 41422_2018_29_MOESM7_ESM.pdf]

## Supplementary information, Figure S7

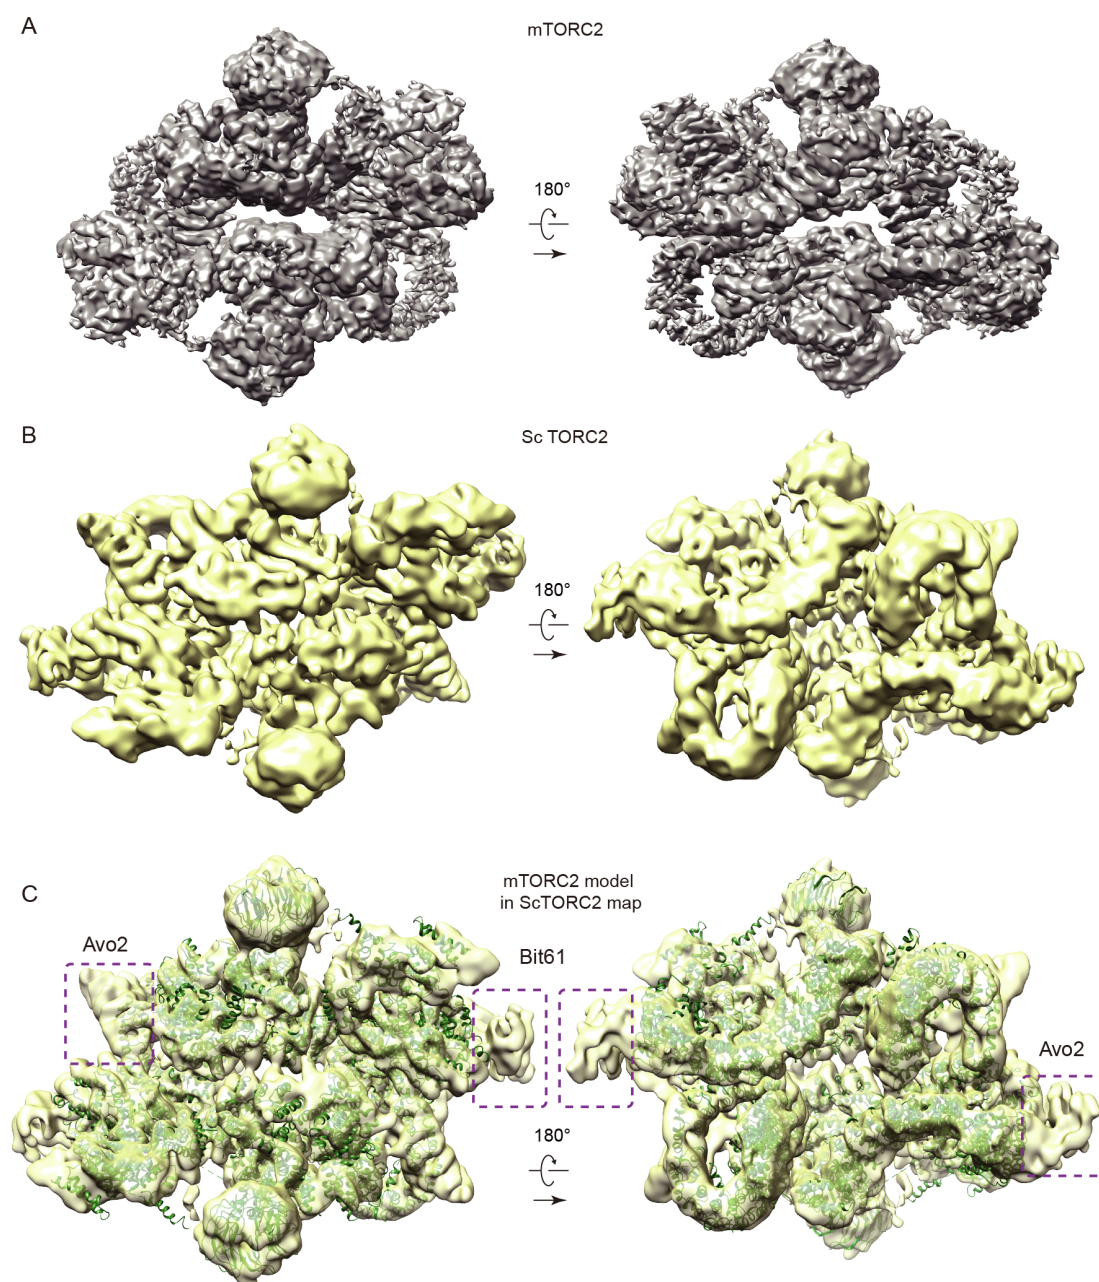

**Figure S7** Comparison of the EM maps of mTORC2 and scTORC2. **(A, B)** Two different views of the EM maps of human mTORC2 at 4.9 Å **(A)** and scTORC2 at 7.9 Å **(B)** resolution, respectively. **(C)** Fitting of the human mTORC2 model into the scTORC2 EM map. Extra densities corresponding to Avo2 and Bit61, the two non-essential components of scTORC2, are indicated.
