# Supplementary material
Source: PubMed Central journal article supplement (PMC5951902)
Supplement: 41422_2018_29_MOESM9_ESM.pdf [file 41422_2018_29_MOESM9_ESM.pdf]

## Supplementary information, Table S2

**Table S2. Statistics for data collection and model refinement of mTORC2 complex**

|                                                 |         |
|-------------------------------------------------|---------|
| Data collection                                 |         |
| Particles for refinement                        | 195,353 |
| Pixel Size (Å)                                  | 1.01    |
| Defocus range (µm)                              | 1.7-4.4 |
| Electron dose (e <sup>-</sup> /Å <sup>2</sup> ) | 50      |
| Refinement                                      |         |
| CC across whole map volume                      | 82.60%  |
| CC only across atoms in the model               | 82.49%  |
| R.m.s deviations                                |         |
| Bond lengths (Å)                                | 0.013   |
| Bond angles (°)                                 | 1.532   |
| Ramachandran plot statistics                    |         |
| Most favored (%)                                | 85.63   |
| Disallowed (%)                                  | 0.29    |
